# Supplementary material
Source: Research Square preprint supplement (doi:10.21203/rs.3.rs-9110554/v1)
Supplement: Supplementary file 1 [file 7451033139cd6d1347e8a5e2.docx]

Supplementary Table 1. Time required for admission to a specialized rehabilitation hospital (day)

| Before | | After | |
| --- | --- | --- | --- |
| Mean ± SD | Median (Q1–Q3) | Mean ± SD | Median (Q1–Q3) |
| 39.3 ± 22.4 | 37 (20–55) | 36.2 ± 22.0 | 30.5 (20–48.5) |

SD, standard deviation
